# Supplementary material
Source: Elsevier journal article supplement (https://www.sciencedirect.com/science/article/pii/S0021755719305947)
Supplement: mmc1 [file S0021755719305947:mmc1.docx]

**JPED-2019-497 – Supplementary Material**

**Supplementary Table 1 - Prevalence of the gum pad relationship of the groups: very-low-weight-preterm infants and term infants.**

| **Gum pad relationship (n = 154)** | **Group A (n = 54)** | **Group B (n = 100)** | **Total (n = 154)** |
| --- | --- | --- | --- |
| Overbite | 1 (2%) | 2 (2%) | 3 (2%) |
| Overjet | 21 (39%) | 17 (17%) | 38 (25%) |
| Overbite-overjet | 23 (43%) | 77 (77%) | 100 (65%) |
| End-to-end | 1 (2%) | 1 (1%) | 2 (1%) |
| Open-bite | 8 (15%) | 3 (3%) | 11 (7%) |

NOTE:

Group A = Group of very-low-birth-weight preterm infants;

Group B = Group of full-term newborns.
